# Supplementary material for: A Feeling of Otherness: A Qualitative Research Synthesis Exploring the Lived Experiences of Stigma in Individuals with Inflammatory Bowel Disease
Source: MDPI journal article supplement (doi:10.3390/ijerph18158038), 2021-07-29
Supplement: s1 [file s1]

**Table S1.** Critical Appraisal Skills Programme (2019) Qualitative Checklist for included articles.

|                                    | 1. Statement of aims | 2. Appropriate methodology | 3. Appropriate design | 4. Appropriate recruitment strategy | 5. Data collection method justified and clear | 6. Consideration of relationship b/tw researcher & ppts | 7. Consideration of ethical issues                          | 8. Rigorous data analysis                                                 | 9. Clear statement of findings | 10. Is the research valuable? |
|------------------------------------|----------------------|----------------------------|-----------------------|-------------------------------------|-----------------------------------------------|---------------------------------------------------------|-------------------------------------------------------------|---------------------------------------------------------------------------|--------------------------------|-------------------------------|
| Alexakis et al. (2015) [54]        | Yes                  | Yes                        | Yes                   | Yes                                 | Yes                                           | Yes                                                     | Yes                                                         | Yes                                                                       | Yes                            | Yes                           |
| Barned et al. (2016) [40]          | Yes                  | Yes                        | Yes                   | Yes                                 | Yes                                           | Can't tell.                                             | Yes                                                         | Yes                                                                       | Yes                            | Yes                           |
| Brydolf and Segesten (1996) [52]   | Yes                  | Yes                        | Yes                   | Yes                                 | Yes                                           | Yes                                                     | Yes.<br>Consideration given but ethics approval not stated. | Yes                                                                       | Yes                            | Yes                           |
| Carter et al. (2020) [55]          | Yes                  | Yes                        | Yes                   | Yes                                 | Yes                                           | Yes                                                     | Yes                                                         | Yes                                                                       | Yes                            | Yes                           |
| Cho et al. (2018) [56]             | Yes                  | Yes                        | Yes                   | Yes                                 | Yes                                           | Yes                                                     | Yes                                                         | Yes                                                                       | Yes                            | Yes                           |
| Cooper et al. (2010) [57]          | Yes                  | Yes                        | Yes                   | Yes                                 | Yes                                           | Yes                                                     | Yes                                                         | Yes                                                                       | Yes                            | Yes                           |
| Czuber-Dochan et al. (2012) [58]   | Yes                  | Yes                        | Yes                   | Yes                                 | Yes                                           | Yes                                                     | Yes                                                         | Yes                                                                       | Yes                            | Yes                           |
| Czuber-Dochan et al. (2020) [59]   | Yes                  | Yes                        | Yes                   | Yes                                 | Yes                                           | Yes                                                     | Yes                                                         | Yes                                                                       | Yes                            | Yes                           |
| Daniel (2002) [43]                 | Yes                  | Yes                        | Yes                   | Yes                                 | Yes                                           | Can't tell.                                             | Yes                                                         | Yes                                                                       | Yes                            | Yes                           |
| Demirtas (2021) [41]               | Yes                  | Yes                        | Yes                   | Yes                                 | Yes                                           | Can't tell.                                             | Yes                                                         | Yes                                                                       | Yes                            | Yes                           |
| Devlen et al. (2014) [44]          | Yes                  | Yes                        | Yes                   | Yes                                 | Yes                                           | Can't tell.                                             | Yes                                                         | Yes                                                                       | Yes                            | Yes                           |
| Dibley et al. (2014) [29]          | Yes                  | Yes                        | Yes                   | Yes                                 | Yes                                           | Can't tell.                                             | Yes                                                         | Yes                                                                       | Yes                            | Yes                           |
| Dibley et al. (2018) [23]          | Yes                  | Yes                        | Yes                   | Yes.                                | Yes                                           | Yes                                                     | Yes                                                         | Yes                                                                       | Yes                            | Yes                           |
| Dibley et al. (2019) [28]          | Yes                  | Yes                        | Yes                   | Yes.                                | Yes                                           | Yes                                                     | Yes                                                         | Yes                                                                       | Yes                            | Yes                           |
| Dudley-Brown (1996) [42]           | Yes                  | Yes                        | Yes                   | Yes                                 | Yes                                           | Can't tell.                                             | Can't tell.                                                 | Yes                                                                       | Yes                            | Yes                           |
| Frohlich (2014) [30]               | Yes                  | Yes                        | Yes                   | Yes                                 | Yes                                           | Yes                                                     | Yes                                                         | Can't tell.<br>In-depth description of the analysis process not provided. | Yes                            | Yes                           |
| García-Sanjuán, et al. (2017) [45] | Yes                  | Yes                        | Yes                   | Yes                                 | Yes                                           | Can't tell.                                             | Yes                                                         | Yes                                                                       | Yes                            | Yes                           |
| Hall et al. (2005) [60]            | Yes                  | Yes                        | Yes                   | Yes                                 | Yes                                           | Yes.                                                    | Yes                                                         | Yes                                                                       | Yes                            | Yes                           |

[illegible]
